# Supplementary material
Source: ML conference proceedings conference paper supplement (https://proceedings.neurips.cc/paper_files/paper/2022/hash/16e71d1a24b98a02c17b1be1f634f979-Abstract.html)
Supplement: Supplementary file 1 [file 16e71d1a24b98a02c17b1be1f634f979-Supplemental-Conference.zip]

Archive with 2 entries (2 files):
- CroCo_NeurIPS22_appendix.pdf
- CroCo_NeurIPS22_suppmat.webm
